# Supplementary material
Source: PubMed Central journal article supplement (PMC1719143)
Supplement: archdisch_archdischild;86_4_240__1.pdf [file archdisch_archdischild%3B86_4_240__1.pdf]

**NUT ALLERGY IN SCHOOL CHILDREN**

**Questionnaire for Head teachers**

*\*Please complete the short questions below and return the questionnaire in the pre-paid envelope. Your responses will be a valuable source of information in our preparation of a strategy and guidelines for the care of school children with nut allergy. All information is analysed anonymously and confidentially.*

- 1. The number of children in your school .....
- 2. i. Number of children currently known to have nut allergy .....
- ii. Have you had any children with nut allergy in the past Y/N
- 3. Number of children needing medication in school for nut allergy. ....
- 4. Does each nut allergic child have a support assistant. If yes, at what times?  
Please answer below for each child.

|          | Support assistant | Times |
|----------|-------------------|-------|
| Child 1. | Y/N               |       |
| Child 2. | Y/N               |       |
| Child 3. | Y/N               |       |

If more children, please provide information below:  
.....

- 5. i. What medications are available in school for each child.
- Child 1. ....
- Child 2.....
- Child 3.....

Please provide information below if additional children:  
.....

- 6. Where is the medication stored .....

ii. Is the storage place readily accessible at all times      YES / NO

Please give details.....

7. Who is trained to administer the medications in your school? Please state below and give any additional information:

8. What signs of an allergic reaction would you look for in the case of a

i. mild reaction .....

ii. severe reaction.....

9. What action would you take if a child has a reaction. Please list in order?

- 1.....
- 2.....
- 3.....
- 4.....
- 5.....

10. What dietary or other preventative advice has been given to the school staff and by whom?

11. Do you have a protocol for children with nut allergy?      Y/N

If Yes please give details below:

12. Do you require more information about nut allergy?      Y/N

Comments:

SECTION B. *\*Please tick as appropriate*

|                                                                                        | YES   | NO    | DON'T KNOW |
|----------------------------------------------------------------------------------------|-------|-------|------------|
| 1. Our school is a 'nut free zone'                                                     | ..... | ..... | .....      |
| a. No nuts are allowed in school                                                       | ..... | ..... | .....      |
| b. No food with nut traces or nut oils is allowed in school                            | ..... | ..... | .....      |
| 2. All our school dinners are 'nut free'                                               | ..... | ..... | .....      |
| 3. All teachers are given information about nut allergy in this school                 | ..... | ..... | .....      |
| 4. Dinner supervisors and other assistants are given information regarding nut allergy | ..... | ..... | .....      |
| 5. The cook / catering service are aware of all the children with nut allergy          | ..... | ..... | .....      |
| 6. Our insurance adequately covers us to administer all necessary medications          | ..... | ..... | .....      |

SECTION C

|                                                                                                           | <i>strongly disagree</i> | <i>disagree</i> | <i>No view either way</i> | <i>agree</i> | <i>agree strongly</i> |
|-----------------------------------------------------------------------------------------------------------|--------------------------|-----------------|---------------------------|--------------|-----------------------|
| 1. a.All schools should be 'nut free zones'                                                               | .....                    | .....           | .....                     | .....        | .....                 |
| b.All school dinners should be nut free                                                                   | .....                    | .....           | .....                     | .....        | .....                 |
| 2. Parents usually provide us with adequate information about children with nut allergy                   | .....                    | .....           | .....                     | .....        | .....                 |
| 3. Local arrangements and guidelines are sufficient to deal with the problem of children with nut allergy | .....                    | .....           | .....                     | .....        | .....                 |
| 4. There should be National guidelines Regarding nut allergy in schools                                   | .....                    | .....           | .....                     | .....        | .....                 |
| 5. We feel confident that we can deal with a child suffering an allergic reaction in school               | .....                    | .....           | .....                     | .....        | .....                 |
| 6. Nut Allergy is potentially lethal                                                                      | .....                    | .....           | .....                     | .....        | .....                 |
|                                                                                                           | <i>strongly disagree</i> | <i>disagree</i> | <i>No view either way</i> | <i>agree</i> | <i>agree strongly</i> |

7. Teachers are adequately informed about nut allergy ..... ..

8. Children requiring an epi-pen (or other adrenalin injection) should carry one on themselves ..... ..

**ANY ADDITIONAL COMMENTS PLEASE STATE BELOW**

**How do you feel about giving the Epi-pen injection?**

**COMMENTS:**

*(Please mention any problems or useful ideas that may improve the management of these children in school)*
